# Supplementary material for: SNP-Based Heritability of Osteochondrosis Dissecans in Hanoverian Warmblood Horses
Source: MDPI journal article supplement (doi:10.3390/ani13091462), 2023-04-25
Supplement: s1 [file s1]

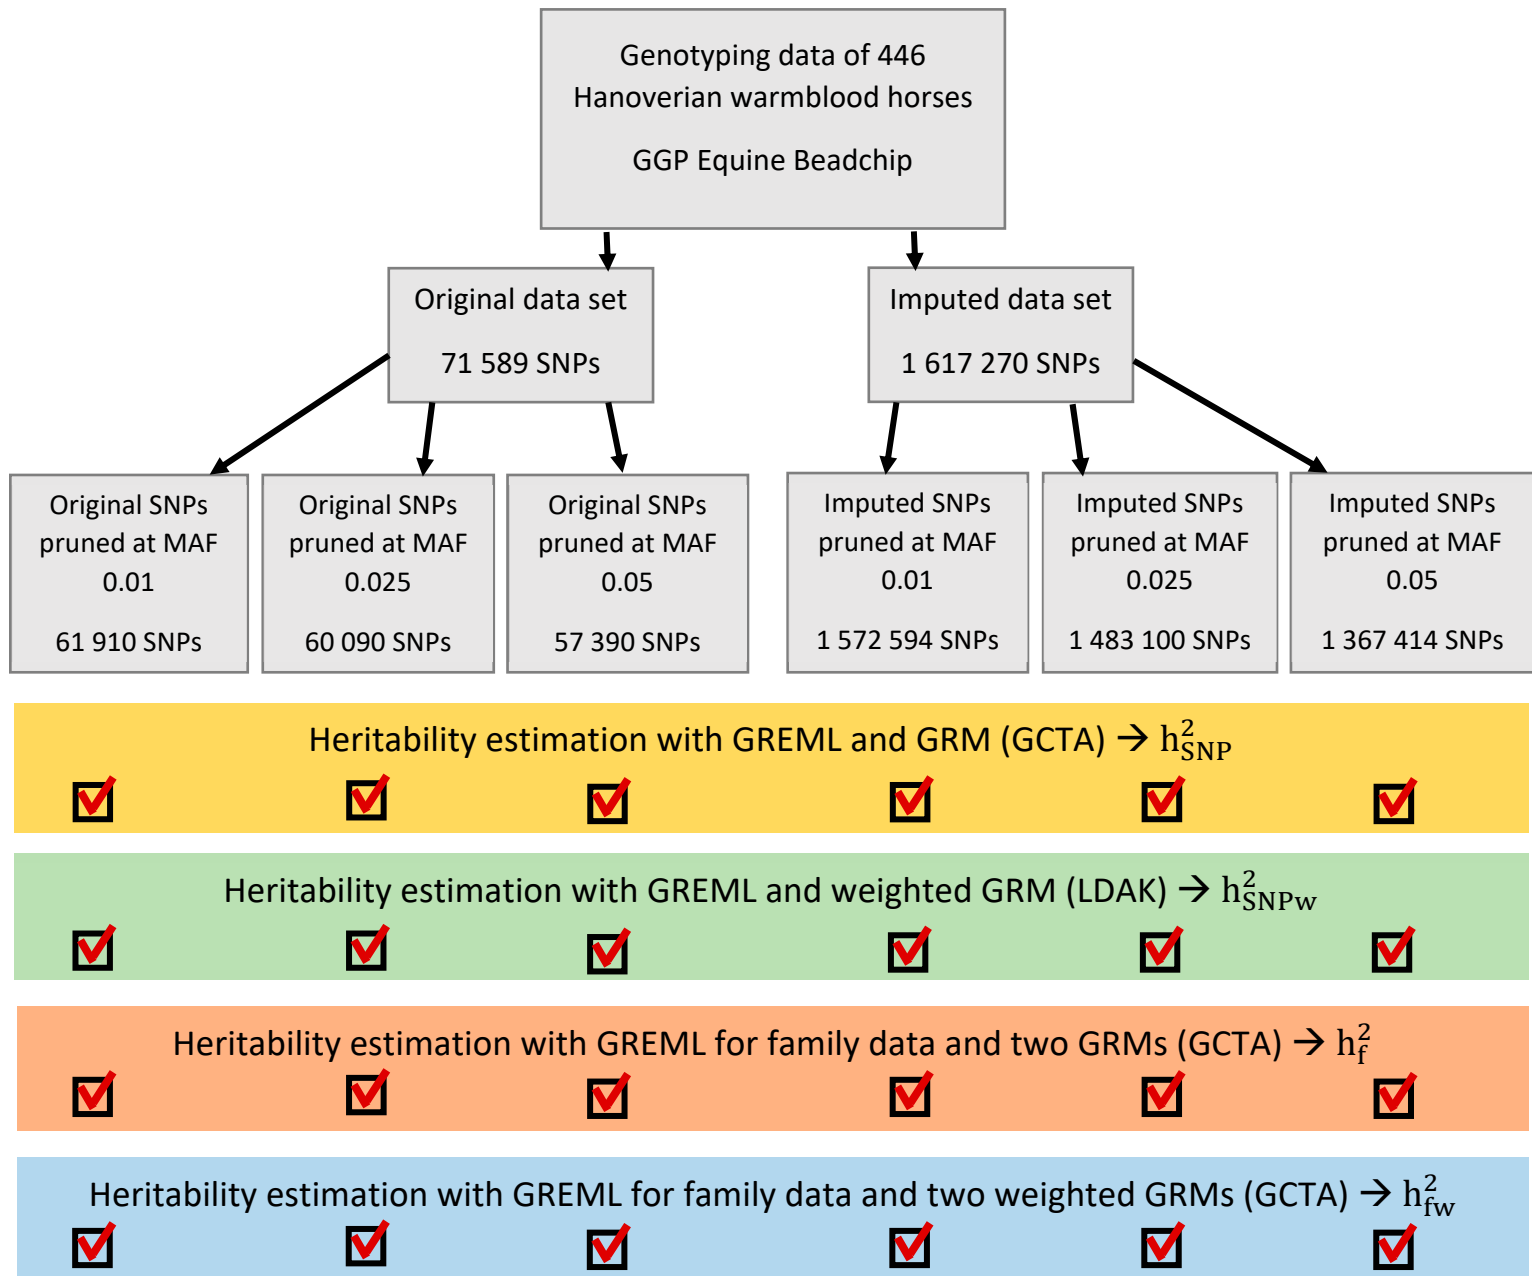

**Figure S1.** Survey on the study design to estimate heritabilities using different approaches and genotype data.

**Table S1.** Estimates of heritability for equine osteochondrosis reported in previous studies

| Population and number of investigated horses              | Radiographic finding | Heritability estimate | Method of analysis | References                 |
|-----------------------------------------------------------|----------------------|-----------------------|--------------------|----------------------------|
| (Australian and New Zealand) Thoroughbred horses (n=1004) | OC                   | 0.11                  | GLMM               | Castle (2012) [21]         |
|                                                           | OC fore fetlock      | 0.15                  |                    |                            |
|                                                           | OC hock              | 0.10                  |                    |                            |
|                                                           | OC stifle            | 0.10                  |                    |                            |
| Norwegian Standardbred trotters (n=1217)                  | OC DIT/LTT           | 0.29 ± 0.15           | STM, DL            | Lykkjen et al. (2013) [20] |
|                                                           | OC DIT               | 0.40 ± 0.17           |                    |                            |
| Hanoverian warmblood horses (n=7396)                      | OC fetlock           | 0.167 ± 0.032         | LAM, DL            | Hilla and Distl (2013) [5] |
|                                                           | OC hock              | 0.345 ± 0.039         |                    |                            |
|                                                           | OC stifle            | 0.205 ± 0.043         |                    |                            |
|                                                           | OCD fetlock          | 0.162 ± 0.038         |                    |                            |
|                                                           | OCD hock             | 0.462 ± 0.058         |                    |                            |
|                                                           | OCD stifle           | 0.234 ± 0.070         |                    |                            |
| (Australian) Thoroughbred horses (n=1962)                 | OC                   | 0.08                  | LSM, DL            | Russell et al. (2017) [19] |
|                                                           | OC stifle            | 0.16                  |                    |                            |
|                                                           | OC hock              | 0.00                  |                    |                            |
|                                                           | OC fetlock           | 0.02                  |                    |                            |
| Polish Warmblood horses (n=201)                           | OCD                  | 0.30-0.27             | SNP, LAM, DL       | Lewczuk et al. (2017) [22] |
| North American Standardbred horses (n=479)                | OC hock              | 0.24 ± 0.16           | SNP, GREML         | McCoy et al. (2019) [23]   |

DIT, distal intermediate ridge of the tibia; LTT, lateral trochlear ridge of the talus; GLMM, generalised linear mixed model; STM, Sire threshold model; REML, Restricted Maximum Likelihood; LSM, Linear sire model; DL, Dempster Lerner transformation onto the liability model; LAM, Linear animal model; SNP, SNP-based genome-wide genotyping; GREML, genomic restricted maximum likelihood

**Table S2.** Publicly available whole genome sequencing data of horses used for imputation.

| <b>Bioproject</b> | <b>Biosample</b> | <b>Breed</b>         |
|-------------------|------------------|----------------------|
| PRJNA230019       | SAMN02422919     | Dülmen Horse         |
| PRJNA230019       | SAMN02439777     | Arabian              |
| PRJNA230019       | SAMN02439778     | Sorraja              |
| PRJNA230019       | SAMN02439779     | Hanoverian           |
| PRJNA230019       | SAMN02439779     | Hanoverian           |
| PRJNA291776       | SAMN03952747     | Hanoverian           |
| PRJNA291776       | SAMN03952758     | Hanoverian           |
| PRJNA291776       | SAMN03955412     | Heavy Warmblood      |
| PRJNA205517       | SAMN02179860     | Arabian              |
| PRJNA277030       | SAMN02179856     | Fjord                |
| PRJNA277030       | SAMN02179441     | Standardbred         |
| PRJNA277030       | SAMN02179857     | Icelandic            |
| PRJNA246445       | SAMN02767683     | Marwari              |
| PRJNA273402       | SAMN03291442     | Connemara            |
| PRJNA273402       | SAMN03291461     | Connemara            |
| PRJNA430351       | SAMN08116965     | Hanoverian           |
| PRJNA430351       | SAMN08116967     | Hanoverian           |
| PRJNA430351       | SAMN08116969     | English Thoroughbred |
| PRJNA430351       | SAMN08116970     | Hanoverian           |
| PRJNA430351       | SAMN08116971     | Hanoverian           |
| PRJNA430351       | SAMN08116972     | Hanoverian           |
| PRJNA430351       | SAMN08116987     | Hanoverian           |
| PRJNA430351       | SAMN08116973     | Hanoverian           |
| PRJNA430351       | SAMN08116989     | Hanoverian           |
| PRJNA430351       | SAMN08116988     | Hanoverian           |
| PRJNA430351       | SAMN08116991     | Oldenburg            |
| PRJNA430351       | SAMN08116990     | Hanoverian           |
| PRJNA430351       | SAMN08116993     | Hanoverian           |
| PRJNA430351       | SAMN08116992     | Hanoverian           |
| PRJNA430351       | SAMN08116995     | Oldenburg            |

**Table S3.** Estimates for  $h^2_{\text{SNP-all-pairs}}$  and  $h^2_{\text{SNP-all-pairs-w}}$  with their standard errors for osteochondrosis dissecans in the fetlock joint estimated with GCTA GREML for family data and GCTA GREML for family data with a LD-weighted genomic relationship matrix with the original and imputed SNP data and at minor allele frequencies of 0.01, 0.025 and 0.05, including transformation to the liability scale (obs = observed scale, liab = liability scale).

| Approach                                                                     | Data set | MAF 0.01        |                 | MAF 0.025       |                 | MAF 0.05        |                 |
|------------------------------------------------------------------------------|----------|-----------------|-----------------|-----------------|-----------------|-----------------|-----------------|
|                                                                              |          | Obs             | Liab            | Obs             | Liab            | Obs             | Liab            |
| GREML fam<br>( $h^2_{\text{SNP-all-pairs}} \pm \text{SE}$ )                  | original | 0.16 $\pm$ 0.18 | 0.30 $\pm$ 0.34 | 0.15 $\pm$ 0.18 | 0.28 $\pm$ 0.33 | 0.09 $\pm$ 0.17 | 0.18 $\pm$ 0.32 |
|                                                                              | imputed  | 0.12 $\pm$ 0.16 | 0.23 $\pm$ 0.30 | 0.10 $\pm$ 0.16 | 0.19 $\pm$ 0.29 | 0.09 $\pm$ 0.15 | 0.17 $\pm$ 0.28 |
| GREML fam<br>LD-weighted<br>( $h^2_{\text{SNP-all-pairs-w}} \pm \text{SE}$ ) | original | 0.16 $\pm$ 0.18 | 0.29 $\pm$ 0.34 | 0.14 $\pm$ 0.18 | 0.27 $\pm$ 0.33 | 0.14 $\pm$ 0.18 | 0.26 $\pm$ 0.33 |
|                                                                              | imputed  | 0.12 $\pm$ 0.16 | 0.23 $\pm$ 0.30 | 0.10 $\pm$ 0.16 | 0.19 $\pm$ 0.29 | 0.09 $\pm$ 0.15 | 0.17 $\pm$ 0.28 |

**Table S4.** Estimates for  $h^2_{\text{SNP-all-pairs}}$  and  $h^2_{\text{SNP-all-pairs-w}}$  with their standard errors for osteochondrosis dissecans in the hock joint estimated with GCTA GREML for family data and GCTA GREML for family data with a LD-weighted genomic relationship matrix with the original and imputed SNP data and at minor allele frequencies of 0.01, 0.025 and 0.05, including transformation to the liability scale (obs = observed scale, liab = liability scale).

| Approach                                                                     | Data set | MAF 0.01        |                 | MAF 0.025       |                 | MAF 0.05        |                 |
|------------------------------------------------------------------------------|----------|-----------------|-----------------|-----------------|-----------------|-----------------|-----------------|
|                                                                              |          | Obs             | Liab            | Obs             | Liab            | Obs             | Liab            |
| GREML fam<br>( $h^2_{\text{SNP-all-pairs}} \pm \text{SE}$ )                  | original | 0.53 $\pm$ 0.18 | 0.91 $\pm$ 0.31 | 0.49 $\pm$ 0.18 | 0.84 $\pm$ 0.30 | 0.44 $\pm$ 0.17 | 0.76 $\pm$ 0.30 |
|                                                                              | imputed  | 0.49 $\pm$ 0.16 | 0.84 $\pm$ 0.28 | 0.46 $\pm$ 0.16 | 0.79 $\pm$ 0.27 | 0.44 $\pm$ 0.15 | 0.75 $\pm$ 0.25 |
| GREML fam<br>LD-weighted<br>( $h^2_{\text{SNP-all-pairs-w}} \pm \text{SE}$ ) | original | 0.50 $\pm$ 0.18 | 0.86 $\pm$ 0.31 | 0.49 $\pm$ 0.18 | 0.83 $\pm$ 0.30 | 0.49 $\pm$ 0.18 | 0.83 $\pm$ 0.30 |
|                                                                              | imputed  | 0.57 $\pm$ 0.18 | 0.98 $\pm$ 0.31 | 0.58 $\pm$ 0.18 | 1.00 $\pm$ 0.31 | 0.54 $\pm$ 0.18 | 0.92 $\pm$ 0.30 |

**Table S5.** Estimates for  $h^2_{\text{SNP-all-pairs}}$  and  $h^2_{\text{SNP-all-pairs-w}}$  with their standard errors for osteochondrosis dissecans in the stifle joint estimated with GCTA GREML for family data and GCTA GREML for family data with a LD-weighted genomic relationship matrix with the original and imputed SNP data and at minor allele frequencies of 0.01, 0.025 and 0.05, including transformation to the liability scale (obs = observed scale, liab = liability scale).

| Approach                                                                     | Data set | MAF 0.01        |                 | MAF 0.025       |                 | MAF 0.05          |                   |
|------------------------------------------------------------------------------|----------|-----------------|-----------------|-----------------|-----------------|-------------------|-------------------|
|                                                                              |          | Obs             | Liab            | Obs             | Liab            | Obs               | Liab              |
| GREML fam<br>( $h^2_{\text{SNP-all-pairs}} \pm \text{SE}$ )                  | original | 0.20 $\pm$ 0.19 | 1.31 $\pm$ 1.23 | 0.24 $\pm$ 0.19 | 1.53 $\pm$ 1.24 | 0.22 $\pm$ 0.19   | 1.42 $\pm$ 1.20   |
|                                                                              | imputed  | 0.02 $\pm$ 0.16 | 0.15 $\pm$ 1.00 | 0.02 $\pm$ 0.15 | 0.15 $\pm$ 0.96 | <0.001 $\pm$ 0.15 | <0.001 $\pm$ 0.93 |
| GREML fam<br>LD-weighted<br>( $h^2_{\text{SNP-all-pairs-w}} \pm \text{SE}$ ) | original | 0.14 $\pm$ 0.19 | 0.91 $\pm$ 1.19 | 0.13 $\pm$ 0.18 | 0.86 $\pm$ 1.17 | 0.14 $\pm$ 0.18   | 0.90 $\pm$ 1.17   |
|                                                                              | imputed  | 0.13 $\pm$ 0.19 | 0.84 $\pm$ 1.20 | 0.07 $\pm$ 0.17 | 0.47 $\pm$ 1.12 | 0.07 $\pm$ 0.17   | 0.49 $\pm$ 1.12   |
